# Supplementary material for: The ASK-16 Motorized Glider: An Airborne Eddy Covariance Platform to measure Turbulence, Energy and Matter Fluxes
Source: Copernicus journal article supplement (doi:10.5194/egusphere-2024-1586), 2024-07-11
Supplement: Supplementary file 1 [file egusphere-2024-1586-supplement.pdf]

## Supplement to:

# The ASK-16 Motorized Glider: An Airborne Eddy Covariance Platform to measure Turbulence, Energy and Matter Fluxes

5

Inge Wiekenkamp<sup>1</sup>, Anna Katharina Lehmann<sup>2</sup>, Alexander Buetow<sup>2</sup>, Jürgen Fischer<sup>2</sup>, Jörg Hartmann<sup>3</sup>, Stefan Metzger<sup>4</sup>, Thomas Ruhtz<sup>2</sup>, Christian Wille<sup>1</sup>, Mathias Zöllner<sup>1</sup>, Torsten Sachs<sup>1</sup>

*Correspondence to:* Inge Wiekenkamp ([inge.wiekenkamp@gfz-potsdam.de](mailto:inge.wiekenkamp@gfz-potsdam.de))

10 The aim of this supplementary material is to provide transparent and detailed background information about the ASK 16 measurement platform. In supplement A more details are provided about the flight maneuvers that have been used to calibrate the wind measurements. This includes detailed tables, that present measurement conditions during the calibration maneuvers. In Supplement B more information about atmospheric boundary layer height conditions is given for two specific flight dates (29.08.2018 and 21.09.2019).

## 15 **Supplement A: Flight Maneuver Information**

Flight maneuvers were performed during several calibration and measurement flights to obtain calibration parameters for the angle of attack, the sideslip angle, the static pressure and the dynamic pressure. Tables S1 – S5 provide information about flight itself (e.g. height, flight time etc.) and the meteorological conditions that were prone during the flight maneuvers. Additionally, all tables provide information about

20 the optimized parameterization of the individual flight maneuvers.

25 Table S1: General information about the speed maneuvers, including general flight information (date, time, mean height, and mean groundspeed), meteorological conditions (median windspeed, wind directions, and wind vector information). The table also includes the range in measured static pressure ( $P_s$ ) and static pressure defect (err  $P_s$ ). Wind conditions were calculated with the median calibration parameters for 2017/2018 and 2019/2022 from Table 3 (and not with the obtained calibration parameters for each individual maneuver –  $a_1$  and  $a_2$  Eq. 2). Symbology:

30  $M$  = median,  $lon$  = longitude;  $lat$  = latitude;  $alt$  = altitude;  $m.a.g.l.$  = meters above ground level;  $T$  = temperature;  $wspd$  = windspeed;  $wdir$  = wind direction,  $v_{gs}$  = groundspeed,  $r^2$  = coefficient of determination representing fit for parameters  $a_1$  and  $a_2$  (fit for parameter  $a_3$  is provided in Table S2).

| <i>no</i> | <i>flight date</i> | <i>flight time</i>        | <i>M(lon)</i> | <i>M(lat)</i> | <i>M(alt)</i>   | <i>M(T)</i> | <i>M(wspd)</i> | <i>M(wdir)</i> | <i>M(w)</i> | <i>range</i><br><i>v<sub>gs</sub></i> | <i>a<sub>1</sub></i><br><i>Eq. 2</i> | <i>a<sub>2</sub></i><br><i>Eq. 2</i> | <i>r<sup>2</sup> fit</i><br><i>Eq</i><br><i>.2</i> |
|-----------|--------------------|---------------------------|---------------|---------------|-----------------|-------------|----------------|----------------|-------------|---------------------------------------|--------------------------------------|--------------------------------------|----------------------------------------------------|
|           | -                  | <i>start - end</i>        | <i>deg</i>    | <i>deg</i>    | <i>m.a.g.l.</i> | <i>°K</i>   | <i>m/s</i>     | <i>°</i>       | <i>m/s</i>  | <i>m/s</i>                            | -                                    | -                                    | -                                                  |
| 1         | 8/9/2017           | 17:09:54<br>-<br>17:12:46 | 12.516        | 52.1          | 2557            | 278         | 11.8           | 230            | 0.48        | 12.1 -<br>32.96                       | 0.045                                | -2.04                                | 0.97                                               |
| 2         | 9/21/2019          | 10:51:22<br>-<br>10:53:02 | 12.507        | 52.08         | 1052            | 287         | 2.1            | 318            | 0.05        | 27.28<br>-<br>48.19                   | 0.045                                | -1.72                                | 0.99                                               |
| 3         | 5/4/2022           | 12:28:44<br>-<br>12:29:45 | 12.56         | 52.12         | 779             | 284         | 2.7            | 135            | 0.49        | 20.93<br>-<br>48.75                   | 0.056                                | -1.62                                | 0.98                                               |
| 4         | 6/7/2018           | 18:12:33<br>-<br>18:18:46 | 12.671        | 52.12         | 631             | 295         | 7.0            | 112            | 0.05        | 30.19<br>-<br>57.67                   | 0.048                                | -1.98                                | 0.98                                               |
| 5         | 4/17/2019          | 11:08:58<br>-<br>11:20:28 | 12.756        | 51.98         | 1631            | 276         | 8.5            | 126            | -0.06       | 18.26<br>-<br>41.51                   | 0.047                                | -2.24                                | 0.92                                               |
| 6         | 9/21/2019          | 10:02:39<br>-<br>10:08:56 | 12.406        | 52.01         | 1080            | 287         | 1.5            | 299            | 0           | 27.21<br>-<br>48.48                   | 0.049                                | -2.09                                | 0.94                                               |
| 7         | 9/21/2019          | 10:47:46<br>-<br>10:53:02 | 12.484        | 52.05         | 1039            | 287         | 2.0            | 303            | 0.06        | 27.28<br>-50.1                        | 0.046                                | -2.12                                | 0.91                                               |
| 8         | 9/21/2019          | 10:07:11<br>-<br>10:09:56 | 12.345        | 51.98         | 1102            | 287         | 1.1            | 306            | -0.05       | 27.73<br>-<br>47.86                   | 0.058                                | -1.94                                | 1.00                                               |
| 9         | 9/21/2019          | 10:09:56<br>-<br>10:13:28 | 12.251        | 51.95         | 1124            | 287         | 1.8            | 337            | 0.05        | 27.88<br>-<br>47.79                   | 0.040                                | -2.42                                | 0.99                                               |
| 10        | 9/21/2019          | 10:11:26<br>-<br>10:13:28 | 12.231        | 51.94         | 1126            | 287         | 2.0            | 338            | -0.01       | 28.99<br>-47-<br>79                   | 0.040                                | -2.44                                | 0.99                                               |
| 11        | 9/21/2019          | 10:47:46<br>-<br>10:49:33 | 12.457        | 52.01         | 1047            | 287         | 1.9            | 294            | -0.04       | 27.41<br>-<br>47.97                   | 0.040                                | -2.15                                | 0.99                                               |
| 12        | 9/21/2019          | 10:49:33<br>-<br>10:51:22 | 12.485        | 52.05         | 1027            | 287         | 2.1            | 292            | 0.12        | 27.57<br>- 50.1                       | 0.053                                | -1.72                                | 0.99                                               |

Table S2: General information about the performed yawing maneuvers, including general flight information (date, time height, groundspeed), meteorological conditions (windspeed, wind directions, and wind vector information) and the obtained calibration parameters – Par  $a_3$  for Eq. 2. and  $C_\beta$  for Eq. 6. All wind parameters were calculated after calibration (using median calibration values for 2017/2018 and 2019/2022 from Table 3 - and not with the parameters in the last column). Symbology:  $M$  = median;  $lat$  = latitude;  $lon$  = longitude;  $alt$  = altitude;  $m.a.g.l.$  = meters above ground level;  $T$  = temperature;  $\mu$  = average conditions;  $wspd$  = windspeed;  $wdir$  = wind direction;  $v_{gs}$  = groundspeed;  $\theta$  = Pitch angle;  $\Psi$  = heading,  $r^2$  = coefficient of determination representing fit for parameter  $a_3$  in Eq. 2 (fit for other parameters is provided in Table S1). The second part of this table is positioned on the next page.

45

Table S2 part A

| <i>no</i> | <i>flight date</i> | <i>flight time</i>     | <i>M(lon)</i> | <i>M(lat)</i> | <i>M(alt)</i>   | <i>M(T)</i> | <i>M(wspd)</i> | <i>M(wdir)</i> | <i>M(u)</i> | $\sigma(u)$ | $\sigma(v)$ |
|-----------|--------------------|------------------------|---------------|---------------|-----------------|-------------|----------------|----------------|-------------|-------------|-------------|
|           | <i>yyyy-mm-dd</i>  | <i>hh:mm:ss</i>        | <i>deg</i>    | <i>deg</i>    | <i>m.a.g.l.</i> | $^{\circ}K$ | <i>m/s</i>     | $^{\circ}$     | <i>m/s</i>  | <i>m/s</i>  | <i>m/s</i>  |
| 1         | 2017-08-09         | 17:07:31 -<br>17:07:52 | 12.572        | 52.137        | 2602            | 278.8       | 13.26          | 228.7          | 9.98        | 0.21        | 0.18        |
| 2         | 2022-06-14         | 10:04:40 -<br>10:05:25 | 13.462        | 53.351        | 2364            | 273.5       | 13.29          | 315.7          | 9.28        | 0.1         | 0.15        |
| 3         | 2018-07-16         | 14:44:18 -<br>14:44:33 | 13.254        | 52.235        | 606             | 294.2       | 3.04           | 39.2           | -1.76       | 0.55        | 0.43        |
| 4         | 2018-07-18         | 10:41:46 -<br>10:42:48 | 12.462        | 52.188        | 2357            | 280         | 8.37           | 300.6          | 7.19        | 0.39        | 0.28        |
| 5         | 2018-07-18         | 10:45:19 -<br>10:45:46 | 12.521        | 52.207        | 2415            | 279.4       | 7.87           | 305.4          | 6.4         | 0.25        | 0.26        |
| 6         | 2018-06-07         | 18:26:47 -<br>18:27:55 | 12.712        | 52.079        | 630             | 295.2       | 6.12           | 114.5          | -5.56       | 0.23        | 0.25        |
| 7         | 2019-04-17         | 11:27:58 -<br>11:28:40 | 12.666        | 52.03         | 1822            | 274.2       | 7.44           | 143.5          | -4.28       | 0.38        | 0.55        |
| 8         | 2019-09-21         | 10:19:35 -<br>10:20:00 | 12.342        | 51.963        | 1119            | 286.8       | 1.69           | 300.4          | 1.44        | 0.2         | 0.16        |
| 9         | 2019-09-21         | 10:56:30 -<br>10:57:22 | 12.554        | 52.172        | 1038            | 286.8       | 1.83           | 297.5          | 1.59        | 0.37        | 0.25        |

50

55

60

Table S2 part B

| <i>no</i> | <i>flight_date</i> | <i>min(g<sub>s</sub>)</i> | <i>max(g<sub>s</sub>)</i> | $\sigma(\theta)$ | $\sigma(\Psi)$ | $a_3 Eq. 2$ | $r^2 Eq. 2$ | $C\beta$ | <i>Period</i> | <i>M(w)</i> | <i>M(v)</i> |
|-----------|--------------------|---------------------------|---------------------------|------------------|----------------|-------------|-------------|----------|---------------|-------------|-------------|
|           | yyyy-mm-dd         | m/s                       | m/s                       | °                | °              | -           | -           | -        | s             | m/s         | m/s         |
| 1         | 2017-08-09         | 28.11                     | 33.09                     | 0.13             | 0.32           | -1.02       | 0.71        | 0.072    | 3.01          | 1           | 8.78        |
| 2         | 2022-06-14         | 27.17                     | 31.82                     | 0.09             | 0.59           | -1.50       | 0.94        | 0.070    | 4.10          | 0.32        | -9.51       |
| 3         | 2018-07-16         | 43.84                     | 46.68                     | 0.1              | 0.57           | -1.25       | 0.97        | 0.071    | 3.76          | -1.2        | -2.33       |
| 4         | 2018-07-18         | 25.07                     | 31.41                     | 0.17             | 0.6            | -1.40       | 0.98        | 0.070    | 5.17          | 0.26        | -4.29       |
| 5         | 2018-07-18         | 36.56                     | 40.61                     | 0.15             | 0.61           | -1.49       | 0.98        | 0.070    | 5.41          | 0.15        | -4.53       |
| 6         | 2018-06-07         | 34.47                     | 39.92                     | 0.09             | 0.45           | -1.23       | 0.86        | 0.072    | 7.56          | -0.1        | 2.53        |
| 7         | 2019-04-17         | 40.68                     | 46.76                     | 0.11             | 0.68           | -1.72       | 0.97        | 0.069    | 6.01          | 0.53        | 5.94        |
| 8         | 2019-09-21         | 34.95                     | 40.97                     | 0.19             | 0.53           | -1.64       | 0.97        | 0.071    | 4.17          | 0.19        | -0.85       |
| 9         | 2019-09-21         | 36.3                      | 41.44                     | 0.1              | 0.61           | -1.52       | 0.97        | 0.072    | 5.78          | 0.01        | -0.78       |

65 Table S3: General information about the unbound and return flights (legs), including general flight information (date, flight time, height, groundspeed, true airspeed), meteorological conditions (windspeed, wind directions, and wind vector information), and information about the position of the aircraft (true track, heading and drift angle). All wind parameters were calculated after calibration (using median calibration values for 2017/2018 and 2019/2022). Symbology: *lon* = longitude, *lat* = latitude; *T* = temperature; *M* = median; *wspd* = windspeed; *wdir* = wind direction; *v<sub>gs</sub>* = groundspeed; *v<sub>tas</sub>* = true airspeed; *θ* = Pitch angle; *Ψ* = Heading,

|    | <i>flight date</i> | <i>flight leg</i> | <i>flight time</i> | <i>dist</i> | <i>M(lon)</i> | <i>M(lat)</i> | <i>M(alt)</i>   | <i>M(T)</i> | <i>M(wspd)</i> | <i>M(wdir)</i> | <i>M(γ)</i> | <i>M(w)</i> | <i>M(gs)</i> | <i>ao</i> |
|----|--------------------|-------------------|--------------------|-------------|---------------|---------------|-----------------|-------------|----------------|----------------|-------------|-------------|--------------|-----------|
|    | <i>d/m/y</i>       | -                 | <i>h:m:s</i>       | <i>km</i>   | <i>deg</i>    | <i>deg</i>    | <i>m.a.g.l.</i> | <i>°K</i>   | <i>m/s</i>     | <i>°</i>       | <i>°</i>    | <i>m/s</i>  | <i>m/s</i>   | -         |
| 1  | 8/14/2017          | Leg1              | 11:28:20           | 24.11       | 12.897        | 53.888        | 197             | 290.8       | 2.2            | 195.1          | 33.0        | -0.33       | 39.6         | 5.20      |
|    |                    |                   | -                  |             |               |               |                 |             |                |                |             |             |              |           |
|    |                    |                   | 11:37:40           |             |               |               |                 |             |                |                |             |             |              |           |
| 2  | 8/14/2017          | Leg10             | 16:07:00           | 20.34       | 12.899        | 53.91         | 2094            | 277         | 6.1            | 208.5          | 213.3       | 0.03        | 26.2         | 5.51      |
|    |                    |                   | -                  |             |               |               |                 |             |                |                |             |             |              |           |
|    |                    |                   | 16:16:00           |             |               |               |                 |             |                |                |             |             |              |           |
| 3  | 8/14/2017          | Leg10             | 16:07:00           | 20.34       | 12.899        | 53.91         | 2094            | 277         | 6.1            | 208.5          | 213.3       | 0.03        | 26.2         | 5.51      |
|    |                    |                   | -                  |             |               |               |                 |             |                |                |             |             |              |           |
|    |                    |                   | 16:16:00           |             |               |               |                 |             |                |                |             |             |              |           |
| 4  | 8/14/2017          | Leg1              | 11:28:20           | 24.11       | 12.897        | 53.888        | 197             | 290.8       | 2.2            | 195.1          | 33.0        | -0.33       | 39.6         | 5.20      |
|    |                    |                   | -                  |             |               |               |                 |             |                |                |             |             |              |           |
|    |                    |                   | 11:37:40           |             |               |               |                 |             |                |                |             |             |              |           |
| 5  | 8/14/2017          | Leg2              | 11:39:50           | 23.91       | 12.897        | 53.888        | 221             | 291.4       | 1.8            | 196.2          | 213.5       | -0.26       | 34.15        | 5.36      |
|    |                    |                   | -                  |             |               |               |                 |             |                |                |             |             |              |           |
|    |                    |                   | 11:50:00           |             |               |               |                 |             |                |                |             |             |              |           |
| 6  | 8/14/2017          | Leg3              | 11:51:00           | 23.95       | 12.897        | 53.89         | 197             | 291.9       | 2.1            | 202.7          | 33.2        | -0.24       | 38.67        | 5.45      |
|    |                    |                   | -                  |             |               |               |                 |             |                |                |             |             |              |           |
|    |                    |                   | 12:00:10           |             |               |               |                 |             |                |                |             |             |              |           |
| 7  | 8/14/2017          | Leg4              | 12:01:45           | 23.68       | 12.897        | 53.89         | 210             | 292         | 1.9            | 203.7          | 213.1       | -0.18       | 29.52        | 5.48      |
|    |                    |                   | -                  |             |               |               |                 |             |                |                |             |             |              |           |
|    |                    |                   | 12:12:12           |             |               |               |                 |             |                |                |             |             |              |           |
| 8  | 8/14/2017          | Leg5              | 10:53:00           | 24.26       | 12.913        | 53.894        | 2256            | 278.8       | 5.7            | 211.6          | 33.2        | -0.04       | 40.24        | 5.46      |
|    |                    |                   | -                  |             |               |               |                 |             |                |                |             |             |              |           |
|    |                    |                   | 11:02:05           |             |               |               |                 |             |                |                |             |             |              |           |
| 9  | 8/14/2017          | Leg6              | 11:03:05           | 24.22       | 12.892        | 53.899        | 2272            | 278.6       | 5.1            | 217.1          | 213.4       | 0.03        | 34.05        | 5.49      |
|    |                    |                   | -                  |             |               |               |                 |             |                |                |             |             |              |           |
|    |                    |                   | 11:14:00           |             |               |               |                 |             |                |                |             |             |              |           |
| 10 | 8/14/2017          | Leg7              | 16:37:30           | 22.65       | 12.902        | 53.897        | 222             | 292.4       | 2.7            | 119.5          | 32.9        | -0.07       | 37.26        | 5.45      |
|    |                    |                   | -                  |             |               |               |                 |             |                |                |             |             |              |           |
|    |                    |                   | 16:46:30           |             |               |               |                 |             |                |                |             |             |              |           |
| 11 | 8/14/2017          | Leg8              | 16:48:45           | 23.07       | 12.901        | 53.894        | 229             | 293         | 2.8            | 83.3           | 213.1       | 0.03        | 39.85        | 5.63      |
|    |                    |                   | -                  |             |               |               |                 |             |                |                |             |             |              |           |
|    |                    |                   | 16:57:45           |             |               |               |                 |             |                |                |             |             |              |           |
| 12 | 8/14/2017          | Leg9              | 15:57:30           | 22.66       | 12.91         | 53.889        | 1916            | 278.2       | 6.1            | 201.5          | 32.9        | 0.07        | 45.25        | 5.57      |
|    |                    |                   | -                  |             |               |               |                 |             |                |                |             |             |              |           |
|    |                    |                   | 16:05:20           |             |               |               |                 |             |                |                |             |             |              |           |
| 13 | 8/15/2017          | Leg1              | 06:09:20           | 23.45       | 12.903        | 53.897        | 240             | 290.8       | 14.3           | 159.4          | 32.8        | 0.12        | 42.09        | 5.68      |
|    |                    |                   | -                  |             |               |               |                 |             |                |                |             |             |              |           |
|    |                    |                   | 06:17:40           |             |               |               |                 |             |                |                |             |             |              |           |
| 14 | 8/15/2017          | Leg10             | 09:24:35           | 20.8        | 12.864        | 53.981        | 227             | 294         | 8.3            | 136.9          | 113.5       | -0.11       | 27.79        | 5.45      |
|    |                    |                   | -                  |             |               |               |                 |             |                |                |             |             |              |           |
|    |                    |                   | 09:34:30           |             |               |               |                 |             |                |                |             |             |              |           |
| 15 | 8/15/2017          | Leg11             | 10:41:30           | 22.54       | 12.91         | 53.89         | 2008            | 283.2       | 8.0            | 224.6          | 32.9        | 0.02        | 52.01        | 5.47      |
|    |                    |                   | -                  |             |               |               |                 |             |                |                |             |             |              |           |
|    |                    |                   | 10:48:15           |             |               |               |                 |             |                |                |             |             |              |           |
| 16 | 8/15/2017          | Leg12             | 10:49:40           | 22.16       | 12.888        | 53.894        | 2019            | 283         | 8.3            | 226.4          | 212.8       | -0.02       | 36.12        | 5.47      |
|    |                    |                   | -                  |             |               |               |                 |             |                |                |             |             |              |           |
|    |                    |                   | 10:58:50           |             |               |               |                 |             |                |                |             |             |              |           |

|    | <i>flight date</i> | <i>flight leg</i> | <i>flight time</i> | <i>dist</i> | <i>M(lon)</i> | <i>M(lat)</i> | <i>M(alt)</i>   | <i>M(T)</i> | <i>M(wspd)</i> | <i>M(wdir)</i> | <i>M(<math>\chi</math>)</i> | <i>M(w)</i> | <i>M(gs)</i> | <i><math>\alpha_0</math></i> |
|----|--------------------|-------------------|--------------------|-------------|---------------|---------------|-----------------|-------------|----------------|----------------|-----------------------------|-------------|--------------|------------------------------|
|    | <i>d/m/y</i>       | -                 | <i>h:m:s</i>       | <i>km</i>   | <i>deg</i>    | <i>deg</i>    | <i>m.a.g.l.</i> | <i>°K</i>   | <i>m/s</i>     | <i>°</i>       | <i>°</i>                    | <i>m/s</i>  | <i>m/s</i>   | -                            |
| 17 | 8/15/2017          | Leg2              | 06:20:00           | 23.33       | 12.903        | 53.898        | 249             | 291         | 12.7           | 155.6          | 213.0                       | -0.11       | 27.83        | 5.36                         |
|    |                    |                   | -                  |             |               |               |                 |             |                |                |                             |             |              |                              |
|    |                    |                   | 06:32:10           |             |               |               |                 |             |                |                |                             |             |              |                              |
| 18 | 8/15/2017          | Leg3              | 05:31:00           | 23.41       | 12.914        | 53.895        | 2133            | 281.5       | 3.9            | 231.2          | 33.2                        | -0.05       | 45.48        | 5.41                         |
|    |                    |                   | -                  |             |               |               |                 |             |                |                |                             |             |              |                              |
|    |                    |                   | 05:39:10           |             |               |               |                 |             |                |                |                             |             |              |                              |
| 19 | 8/15/2017          | Leg4              | 05:42:00           | 23.03       | 12.891        | 53.898        | 2167            | 281         | 3.2            | 238.9          | 212.9                       | 0           | 40.08        | 5.46                         |
|    |                    |                   | -                  |             |               |               |                 |             |                |                |                             |             |              |                              |
|    |                    |                   | 05:50:55           |             |               |               |                 |             |                |                |                             |             |              |                              |
| 20 | 8/15/2017          | Leg5              | 08:36:45           | 23.47       | 12.901        | 53.894        | 217             | 293.2       | 8.1            | 139.1          | 33.2                        | -0.11       | 39.38        | 5.44                         |
|    |                    |                   | -                  |             |               |               |                 |             |                |                |                             |             |              |                              |
|    |                    |                   | 08:45:40           |             |               |               |                 |             |                |                |                             |             |              |                              |
| 21 | 8/15/2017          | Leg6              | 08:47:30           | 23.25       | 12.901        | 53.895        | 218             | 293.5       | 7.9            | 133.6          | 213.2                       | -0.08       | 32.12        | 5.45                         |
|    |                    |                   | -                  |             |               |               |                 |             |                |                |                             |             |              |                              |
|    |                    |                   | 08:57:50           |             |               |               |                 |             |                |                |                             |             |              |                              |
| 22 | 8/15/2017          | Leg7              | 09:36:45           | 20.14       | 12.868        | 53.979        | 262             | 294         | 9.0            | 137.8          | 293.5                       | -0.14       | 46.77        | 5.39                         |
|    |                    |                   | -                  |             |               |               |                 |             |                |                |                             |             |              |                              |
|    |                    |                   | 09:43:30           |             |               |               |                 |             |                |                |                             |             |              |                              |
| 23 | 8/15/2017          | Leg8              | 09:46:20           | 20.11       | 12.866        | 53.98         | 222             | 294.6       | 8.3            | 138.4          | 113.5                       | 0           | 29.87        | 5.55                         |
|    |                    |                   | -                  |             |               |               |                 |             |                |                |                             |             |              |                              |
|    |                    |                   | 09:56:00           |             |               |               |                 |             |                |                |                             |             |              |                              |
| 24 | 8/15/2017          | Leg9              | 09:15:00           | 20.55       | 12.862        | 53.982        | 216             | 293.8       | 9.2            | 134.2          | 294.3                       | -0.08       | 45.47        | 5.42                         |
|    |                    |                   | -                  |             |               |               |                 |             |                |                |                             |             |              |                              |
|    |                    |                   | 09:21:50           |             |               |               |                 |             |                |                |                             |             |              |                              |
| 25 | 8/29/2018          | Leg1              | 12:22:58           | 22.55       | 12.904        | 53.899        | 208             | 294.8       | 6.4            | 139.4          | 213.3                       | -0.04       | 35.42        | 5.40                         |
|    |                    |                   | -                  |             |               |               |                 |             |                |                |                             |             |              |                              |
|    |                    |                   | 12:32:46           |             |               |               |                 |             |                |                |                             |             |              |                              |
| 26 | 8/29/2018          | Leg2              | 12:34:35           | 22.37       | 12.904        | 53.899        | 178             | 295.2       | 7.3            | 139.5          | 33.2                        | -0.27       | 41.31        | 5.22                         |
|    |                    |                   | -                  |             |               |               |                 |             |                |                |                             |             |              |                              |
|    |                    |                   | 12:42:50           |             |               |               |                 |             |                |                |                             |             |              |                              |
| 27 | 8/29/2018          | Leg3              | 12:45:56           | 23          | 12.905        | 53.9          | 199             | 295.2       | 6.9            | 133.2          | 213.1                       | -0.08       | 36.17        | 5.47                         |
|    |                    |                   | -                  |             |               |               |                 |             |                |                |                             |             |              |                              |
|    |                    |                   | 12:55:40           |             |               |               |                 |             |                |                |                             |             |              |                              |
| 28 | 8/29/2018          | Leg4              | 12:57:40           | 22.86       | 12.905        | 53.9          | 206             | 295.2       | 7.3            | 134.6          | 33.1                        | 0.03        | 39.77        | 5.59                         |
|    |                    |                   | -                  |             |               |               |                 |             |                |                |                             |             |              |                              |
|    |                    |                   | 13:06:10           |             |               |               |                 |             |                |                |                             |             |              |                              |
| 29 | 8/29/2018          | Leg6              | 13:36:00           | 21.63       | 12.915        | 53.901        | 2081            | 283.6       | 7.9            | 205.2          | 32.1                        | -0.02       | 49.39        | 5.47                         |
|    |                    |                   | -                  |             |               |               |                 |             |                |                |                             |             |              |                              |
|    |                    |                   | 13:42:50           |             |               |               |                 |             |                |                |                             |             |              |                              |
| 30 | 8/29/2018          | Leg7              | 13:44:10           | 20.46       | 12.905        | 53.917        | 2061            | 283.6       | 7.2            | 208.1          | 213.1                       | -0.04       | 35.18        | 5.44                         |
|    |                    |                   | -                  |             |               |               |                 |             |                |                |                             |             |              |                              |
|    |                    |                   | 13:53:00           |             |               |               |                 |             |                |                |                             |             |              |                              |
| 31 | 8/1/2019           | Leg1              | 10:59:30           | 9.42        | 12.897        | 53.208        | 187             | 291.8       | 2.5            | 318.5          | 94.0                        | -0.07       | 36.11        | 5.57                         |
|    |                    |                   | -                  |             |               |               |                 |             |                |                |                             |             |              |                              |
|    |                    |                   | 11:03:30           |             |               |               |                 |             |                |                |                             |             |              |                              |
| 32 | 8/1/2019           | Leg2              | 11:06:25           | 9.63        | 12.89         | 53.206        | 206             | 291.8       | 2.0            | 311.8          | 274.1                       | -0.02       | 33.47        | 5.61                         |
|    |                    |                   | -                  |             |               |               |                 |             |                |                |                             |             |              |                              |
|    |                    |                   | 11:10:55           |             |               |               |                 |             |                |                |                             |             |              |                              |
| 33 | 8/21/2019          | Leg1              | 11:52:00           | 12.85       | 12.905        | 53.202        | 270             | 291.2       | 6.0            | 275.7          | 274.6                       | -0.27       | 29.55        | 5.40                         |
|    |                    |                   | -                  |             |               |               |                 |             |                |                |                             |             |              |                              |
|    |                    |                   | 11:58:30           |             |               |               |                 |             |                |                |                             |             |              |                              |
| 34 | 8/21/2019          | Leg2              | 12:02:00           | 14.55       | 12.888        | 53.206        | 263             | 291.2       | 6.2            | 272.7          | 92.9                        | -0.01       | 39.95        | 5.62                         |
|    |                    |                   | -                  |             |               |               |                 |             |                |                |                             |             |              |                              |
|    |                    |                   | 12:07:30           |             |               |               |                 |             |                |                |                             |             |              |                              |
| 35 | 9/4/2019           | Leg1              | 11:03:00           | 29.44       | 12.462        | 50.143        | 352             | 291.2       | 5.6            | 213.5          | 158.7                       | 0.07        | 28.91        | 5.92                         |
|    |                    |                   | -                  |             |               |               |                 |             |                |                |                             |             |              |                              |
|    |                    |                   | 11:16:45           |             |               |               |                 |             |                |                |                             |             |              |                              |
| 36 | 9/4/2019           | Leg10             | 12:58:35           | 13.96       | 12.473        | 50.136        | 359             | 292.4       | 5.5            | 213            | 252.0                       | -0.46       | 31.17        | 5.25                         |
|    |                    |                   | -                  |             |               |               |                 |             |                |                |                             |             |              |                              |
|    |                    |                   | 13:05:00           |             |               |               |                 |             |                |                |                             |             |              |                              |

|    | <i>flight date</i> | <i>flight leg</i> | <i>flight time</i> | <i>dist</i> | <i>M(lon)</i> | <i>M(lat)</i> | <i>M(alt)</i>   | <i>M(T)</i> | <i>M(wspd)</i> | <i>M(wdir)</i> | <i>M(<math>\chi</math>)</i> | <i>M(w)</i> | <i>M(gs)</i> | <i><math>\alpha_0</math></i> |
|----|--------------------|-------------------|--------------------|-------------|---------------|---------------|-----------------|-------------|----------------|----------------|-----------------------------|-------------|--------------|------------------------------|
|    | <i>d/m/y</i>       | -                 | <i>h:m:s</i>       | <i>km</i>   | <i>deg</i>    | <i>deg</i>    | <i>m.a.g.l.</i> | $^{\circ}K$ | <i>m/s</i>     | $^{\circ}$     | $^{\circ}$                  | <i>m/s</i>  | <i>m/s</i>   | -                            |
| 37 | 9/4/2019           | Leg11             | 13:06:35           | 14.53       | 12.472        | 50.136        | 345             | 292.6       | 6.3            | 219.9          | 72.1                        | -0.09       | 37.79        | 5.77                         |
|    |                    |                   | -                  |             |               |               |                 |             |                |                |                             |             |              |                              |
|    |                    |                   | 13:12:00           |             |               |               |                 |             |                |                |                             |             |              |                              |
| 38 | 9/4/2019           | Leg12             | 13:13:35           | 14.51       | 12.475        | 50.137        | 460             | 292         | 5.7            | 209.2          | 252.2                       | -0.21       | 30.84        | 5.76                         |
|    |                    |                   | -                  |             |               |               |                 |             |                |                |                             |             |              |                              |
|    |                    |                   | 13:20:10           |             |               |               |                 |             |                |                |                             |             |              |                              |
| 39 | 9/4/2019           | Leg13             | 13:22:30           | 12.43       | 12.461        | 50.16         | 408             | 292         | 6.1            | 214.3          | 72.1                        | -0.06       | 43.01        | 5.90                         |
|    |                    |                   | -                  |             |               |               |                 |             |                |                |                             |             |              |                              |
|    |                    |                   | 13:26:50           |             |               |               |                 |             |                |                |                             |             |              |                              |
| 40 | 9/4/2019           | Leg14             | 13:28:45           | 12.42       | 12.461        | 50.16         | 358             | 292.5       | 5.8            | 209.1          | 252.0                       | -0.51       | 32.48        | 5.39                         |
|    |                    |                   | -                  |             |               |               |                 |             |                |                |                             |             |              |                              |
|    |                    |                   | 13:34:30           |             |               |               |                 |             |                |                |                             |             |              |                              |
| 41 | 9/4/2019           | Leg15             | 13:36:20           | 13.36       | 12.462        | 50.16         | 412             | 292.2       | 6.4            | 212.1          | 72.3                        | -0.36       | 42.66        | 5.50                         |
|    |                    |                   | -                  |             |               |               |                 |             |                |                |                             |             |              |                              |
|    |                    |                   | 13:41:10           |             |               |               |                 |             |                |                |                             |             |              |                              |
| 42 | 9/4/2019           | Leg16             | 13:42:32           | 13.44       | 12.462        | 50.16         | 301             | 293.2       | 5.7            | 207.7          | 252.4                       | -0.52       | 32.79        | 5.11                         |
|    |                    |                   | -                  |             |               |               |                 |             |                |                |                             |             |              |                              |
|    |                    |                   | 13:48:40           |             |               |               |                 |             |                |                |                             |             |              |                              |
| 43 | 9/4/2019           | Leg2              | 11:19:00           | 29.4        | 12.457        | 50.154        | 407             | 290.6       | 6.1            | 199.1          | 339.6                       | -0.33       | 38.52        | 5.36                         |
|    |                    |                   | -                  |             |               |               |                 |             |                |                |                             |             |              |                              |
|    |                    |                   | 11:30:15           |             |               |               |                 |             |                |                |                             |             |              |                              |
| 44 | 9/4/2019           | Leg3              | 11:32:23           | 29.87       | 12.461        | 50.143        | 391             | 290.8       | 5.4            | 204.8          | 158.7                       | -0.32       | 31.27        | 5.44                         |
|    |                    |                   | -                  |             |               |               |                 |             |                |                |                             |             |              |                              |
|    |                    |                   | 11:45:50           |             |               |               |                 |             |                |                |                             |             |              |                              |
| 45 | 9/4/2019           | Leg4              | 11:47:55           | 29.78       | 12.456        | 50.156        | 391             | 291         | 6.3            | 200.3          | 338.7                       | -0.46       | 36.49        | 5.23                         |
|    |                    |                   | -                  |             |               |               |                 |             |                |                |                             |             |              |                              |
|    |                    |                   | 11:59:40           |             |               |               |                 |             |                |                |                             |             |              |                              |
| 46 | 9/4/2019           | Leg5              | 12:02:50           | 18.13       | 12.405        | 50.168        | 457             | 291         | 5.6            | 205.5          | 158.8                       | -0.08       | 30.59        | 5.77                         |
|    |                    |                   | -                  |             |               |               |                 |             |                |                |                             |             |              |                              |
|    |                    |                   | 12:11:10           |             |               |               |                 |             |                |                |                             |             |              |                              |
| 47 | 9/4/2019           | Leg6              | 12:13:20           | 18.07       | 12.404        | 50.169        | 395             | 291.4       | 6.3            | 202.5          | 338.4                       | -0.26       | 38.21        | 5.60                         |
|    |                    |                   | -                  |             |               |               |                 |             |                |                |                             |             |              |                              |
|    |                    |                   | 12:20:30           |             |               |               |                 |             |                |                |                             |             |              |                              |
| 48 | 9/4/2019           | Leg7              | 12:23:00           | 20          | 12.404        | 50.171        | 345             | 291.8       | 5.6            | 201.1          | 158.7                       | -0.31       | 30.26        | 5.41                         |
|    |                    |                   | -                  |             |               |               |                 |             |                |                |                             |             |              |                              |
|    |                    |                   | 12:32:45           |             |               |               |                 |             |                |                |                             |             |              |                              |
| 49 | 9/4/2019           | Leg8              | 12:34:05           | 19.8        | 12.406        | 50.165        | 443             | 291.2       | 6.4            | 197.4          | 338.0                       | -0.05       | 38.89        | 5.72                         |
|    |                    |                   | -                  |             |               |               |                 |             |                |                |                             |             |              |                              |
|    |                    |                   | 12:41:34           |             |               |               |                 |             |                |                |                             |             |              |                              |
| 50 | 9/4/2019           | Leg9              | 12:51:40           | 13.77       | 12.47         | 50.135        | 461             | 291.4       | 6.3            | 214            | 72.0                        | 0.1         | 38.86        | 6.22                         |
|    |                    |                   | -                  |             |               |               |                 |             |                |                |                             |             |              |                              |
|    |                    |                   | 12:56:50           |             |               |               |                 |             |                |                |                             |             |              |                              |
| 51 | 9/5/2019           | Leg1              | 09:29:00           | 28.33       | 12.464        | 50.144        | 566             | 286         | 7.2            | 287.4          | 158.6                       | 0.13        | 39           | 6.01                         |
|    |                    |                   | -                  |             |               |               |                 |             |                |                |                             |             |              |                              |
|    |                    |                   | 09:40:00           |             |               |               |                 |             |                |                |                             |             |              |                              |
| 52 | 9/5/2019           | Leg10             | 11:26:36           | 14.41       | 12.472        | 50.134        | 460             | 287.8       | 6.8            | 281.3          | 252.3                       | -0.23       | 27.92        | 5.60                         |
|    |                    |                   | -                  |             |               |               |                 |             |                |                |                             |             |              |                              |
|    |                    |                   | 11:34:30           |             |               |               |                 |             |                |                |                             |             |              |                              |
| 53 | 9/5/2019           | Leg11             | 11:36:20           | 14.09       | 12.482        | 50.137        | 490             | 287.8       | 7.4            | 277.7          | 72.3                        | -0.16       | 42.01        | 5.92                         |
|    |                    |                   | -                  |             |               |               |                 |             |                |                |                             |             |              |                              |
|    |                    |                   | 11:41:20           |             |               |               |                 |             |                |                |                             |             |              |                              |
| 54 | 9/5/2019           | Leg12             | 11:43:10           | 14.11       | 12.479        | 50.136        | 441             | 288.2       | 7.3            | 277.9          | 252.1                       | -0.23       | 30.21        | 5.69                         |
|    |                    |                   | -                  |             |               |               |                 |             |                |                |                             |             |              |                              |
|    |                    |                   | 11:50:20           |             |               |               |                 |             |                |                |                             |             |              |                              |
| 55 | 9/5/2019           | Leg13             | 11:52:40           | 12.91       | 12.468        | 50.156        | 448             | 288         | 8.2            | 273.4          | 72.2                        | -0.49       | 41.28        | 5.34                         |
|    |                    |                   | -                  |             |               |               |                 |             |                |                |                             |             |              |                              |
|    |                    |                   | 11:57:30           |             |               |               |                 |             |                |                |                             |             |              |                              |
| 56 | 9/5/2019           | Leg14             | 11:59:05           | 12.98       | 12.468        | 50.156        | 377             | 288.6       | 6.7            | 275.2          | 252.4                       | -0.35       | 29.26        | 5.56                         |
|    |                    |                   | -                  |             |               |               |                 |             |                |                |                             |             |              |                              |
|    |                    |                   | 12:05:40           |             |               |               |                 |             |                |                |                             |             |              |                              |
| 57 | 9/5/2019           | Leg15             | 12:07:35           | 13.16       | 12.46         | 50.153        | 382             | 288.6       | 7.2            | 278.2          | 72.1                        | -0.52       | 39.85        | 5.11                         |
|    |                    |                   | -                  |             |               |               |                 |             |                |                |                             |             |              |                              |
|    |                    |                   | 12:12:40           |             |               |               |                 |             |                |                |                             |             |              |                              |
| 58 | 9/5/2019           | Leg16             | 12:14:15           | 13.05       | 12.462        | 50.154        | 289             | 289.4       | 6.2            | 279.6          | 252.0                       | -0.24       | 31.42        | 5.51                         |
|    |                    |                   | -                  |             |               |               |                 |             |                |                |                             |             |              |                              |
|    |                    |                   | 12:20:40           |             |               |               |                 |             |                |                |                             |             |              |                              |



|    | <i>flight date</i> | <i>flight leg</i> | <i>flight time</i> | <i>dist</i> | <i>M(lon)</i> | <i>M(lat)</i> | <i>M(alt)</i>   | <i>M(T)</i>         | <i>M(wspd)</i> | <i>M(wdir)</i> | <i>M(<math>\chi</math>)</i> | <i>M(w)</i> | <i>M(gs)</i> | <i><math>\alpha_0</math></i> |
|----|--------------------|-------------------|--------------------|-------------|---------------|---------------|-----------------|---------------------|----------------|----------------|-----------------------------|-------------|--------------|------------------------------|
|    | <i>d/m/y</i>       | -                 | <i>h:m:s</i>       | <i>km</i>   | <i>deg</i>    | <i>deg</i>    | <i>m.a.g.l.</i> | $^{\circ}$ <i>K</i> | <i>m/s</i>     | $^{\circ}$     | $^{\circ}$                  | <i>m/s</i>  | <i>m/s</i>   | -                            |
| 59 | 9/5/2019           | Leg2              | 09:42:08           | 28.66       | 12.463        | 50.146        | 556             | 286                 | 7.0            | 277            | 338.6                       | -0.11       | 32.13        | 5.83                         |
|    |                    |                   | -                  |             |               |               |                 |                     |                |                |                             |             |              |                              |
|    |                    |                   | 09:55:05           |             |               |               |                 |                     |                |                |                             |             |              |                              |
| 60 | 9/5/2019           | Leg3              | 09:57:10           | 29.34       | 12.465        | 50.142        | 533             | 286.5               | 6.5            | 278            | 158.7                       | -0.16       | 36.7         | 5.80                         |
|    |                    |                   | -                  |             |               |               |                 |                     |                |                |                             |             |              |                              |
|    |                    |                   | 10:09:00           |             |               |               |                 |                     |                |                |                             |             |              |                              |
| 61 | 9/5/2019           | Leg4              | 10:11:23           | 29.48       | 12.461        | 50.152        | 498             | 287                 | 6.9            | 274.8          | 338.5                       | -0.1        | 31.55        | 5.86                         |
|    |                    |                   | -                  |             |               |               |                 |                     |                |                |                             |             |              |                              |
|    |                    |                   | 10:24:55           |             |               |               |                 |                     |                |                |                             |             |              |                              |
| 62 | 9/5/2019           | Leg5              | 10:29:00           | 20.36       | 12.409        | 50.164        | 477             | 287                 | 7.7            | 282.4          | 158.4                       | -0.22       | 36.82        | 5.73                         |
|    |                    |                   | -                  |             |               |               |                 |                     |                |                |                             |             |              |                              |
|    |                    |                   | 10:37:10           |             |               |               |                 |                     |                |                |                             |             |              |                              |
| 63 | 9/5/2019           | Leg6              | 10:38:35           | 20.32       | 12.408        | 50.169        | 489             | 287                 | 7.1            | 279.1          | 338.2                       | -0.33       | 27.54        | 5.57                         |
|    |                    |                   | -                  |             |               |               |                 |                     |                |                |                             |             |              |                              |
|    |                    |                   | 10:48:30           |             |               |               |                 |                     |                |                |                             |             |              |                              |
| 64 | 9/5/2019           | Leg7              | 10:49:40           | 19.48       | 12.406        | 50.173        | 540             | 286.8               | 6.7            | 280.3          | 158.4                       | -0.01       | 37.24        | 6.19                         |
|    |                    |                   | -                  |             |               |               |                 |                     |                |                |                             |             |              |                              |
|    |                    |                   | 10:57:37           |             |               |               |                 |                     |                |                |                             |             |              |                              |
| 65 | 9/5/2019           | Leg8              | 11:00:15           | 19.51       | 12.408        | 50.169        | 525             | 286.8               | 6.2            | 280.9          | 338.7                       | -0.14       | 27.64        | 5.92                         |
|    |                    |                   | -                  |             |               |               |                 |                     |                |                |                             |             |              |                              |
|    |                    |                   | 11:09:20           |             |               |               |                 |                     |                |                |                             |             |              |                              |
| 66 | 9/5/2019           | Leg9              | 11:18:30           | 14.2        | 12.469        | 50.133        | 543             | 287                 | 7.6            | 280.2          | 72.1                        | -0.07       | 36.02        | 5.91                         |
|    |                    |                   | -                  |             |               |               |                 |                     |                |                |                             |             |              |                              |
|    |                    |                   | 11:23:50           |             |               |               |                 |                     |                |                |                             |             |              |                              |
| 67 | 5/4/2022           | Leg1              | 12:23:15           | 4.04        | 12.504        | 52.11         | 760             | 284.6               | 3.9            | 148.1          | 74.7                        | 0.67        | 36.24        | 7.01                         |
|    |                    |                   | -                  |             |               |               |                 |                     |                |                |                             |             |              |                              |
|    |                    |                   | 12:25:00           |             |               |               |                 |                     |                |                |                             |             |              |                              |
| 68 | 5/4/2022           | Leg2              | 12:26:00           | 2.86        | 12.522        | 52.122        | 804             | 283.6               | 3.8            | 139.3          | 265.3                       | -0.17       | 39.07        | 5.32                         |
|    |                    |                   | -                  |             |               |               |                 |                     |                |                |                             |             |              |                              |
|    |                    |                   | 12:27:10           |             |               |               |                 |                     |                |                |                             |             |              |                              |
| 69 | 6/14/2022          | Leg1              | 10:05:23           | 3.02        | 13.483        | 53.364        | 2384            | 273.2               | 13.5           | 315.1          | 57.5                        | 0.04        | 30.72        | 5.57                         |
|    |                    |                   | -                  |             |               |               |                 |                     |                |                |                             |             |              |                              |
|    |                    |                   | 10:06:45           |             |               |               |                 |                     |                |                |                             |             |              |                              |
| 70 | 6/14/2022          | Leg2              | 10:07:05           | 3.12        | 13.479        | 53.366        | 2418            | 273.2               | 13.2           | 321.5          | 237.3                       | 0.15        | 39.89        | 5.71                         |
|    |                    |                   | -                  |             |               |               |                 |                     |                |                |                             |             |              |                              |
|    |                    |                   | 10:08:20           |             |               |               |                 |                     |                |                |                             |             |              |                              |
| 71 | 6/15/2022          | Leg1              | 10:11:00           | 23          | 12.901        | 53.892        | 174             | 289.5               | 4.0            | 277.7          | 213.2                       | 0.06        | 32.09        | 5.72                         |
|    |                    |                   | -                  |             |               |               |                 |                     |                |                |                             |             |              |                              |
|    |                    |                   | 10:21:30           |             |               |               |                 |                     |                |                |                             |             |              |                              |
| 72 | 6/15/2022          | Leg2              | 10:24:00           | 21.58       | 12.887        | 53.874        | 170             | 289.5               | 2.6            | 263.1          | 33.3                        | -0.05       | 31.46        | 5.42                         |
|    |                    |                   | -                  |             |               |               |                 |                     |                |                |                             |             |              |                              |
|    |                    |                   | 10:33:30           |             |               |               |                 |                     |                |                |                             |             |              |                              |
| 73 | 6/15/2022          | Leg3              | 13:48:10           | 23.13       | 13.284        | 53.882        | 244             | 290.6               | 3.5            | 318.8          | 197.3                       | 0.07        | 33.28        | 5.74                         |
|    |                    |                   | -                  |             |               |               |                 |                     |                |                |                             |             |              |                              |
|    |                    |                   | 13:58:00           |             |               |               |                 |                     |                |                |                             |             |              |                              |
| 74 | 6/15/2022          | Leg4              | 14:00:40           | 22.67       | 13.281        | 53.874        | 247             | 290.6               | 2.3            | 280.2          | 17.4                        | 0.2         | 34.87        | 5.90                         |
|    |                    |                   | -                  |             |               |               |                 |                     |                |                |                             |             |              |                              |
|    |                    |                   | 14:10:30           |             |               |               |                 |                     |                |                |                             |             |              |                              |
| 75 | 6/15/2022          | Leg5              | 14:22:15           | 25.22       | 12.916        | 53.884        | 249             | 290.6               | 3.1            | 337.7          | 213.0                       | 0.26        | 34.78        | 6.05                         |
|    |                    |                   | -                  |             |               |               |                 |                     |                |                |                             |             |              |                              |
|    |                    |                   | 14:32:30           |             |               |               |                 |                     |                |                |                             |             |              |                              |
| 76 | 6/15/2022          | Leg6              | 14:35:00           | 23.33       | 12.913        | 53.88         | 239             | 290.8               | 2.3            | 327.9          | 33.3                        | -0.08       | 26.76        | 5.39                         |
|    |                    |                   | -                  |             |               |               |                 |                     |                |                |                             |             |              |                              |
|    |                    |                   | 14:46:30           |             |               |               |                 |                     |                |                |                             |             |              |                              |

80 Table S4: General information about the difference in flight conditions between the outbound and return flights (legs).  $\Delta$  values in this table indicate the absolute difference in median conditions between the unbound and the return flight. Symbology: *lon* = longitude, *lat* = latitude; *T* = temperature, *M* = median; *wspd* = windspeed; *alt* = altitude; *wdir* = wind direction,  $\psi$  = heading.

|    | <i>leg 1</i> | <i>leg 2</i> | <i>flight_date</i> | $\Delta(\text{time})$ | $\Delta(\text{alt})$ | $\Delta(T)$ | $\Delta(\text{wspd})$ | $\Delta(\text{wdir})$ | $\Delta(\Psi)$ |
|----|--------------|--------------|--------------------|-----------------------|----------------------|-------------|-----------------------|-----------------------|----------------|
|    | -            | -            | <i>m/d/yyyy</i>    | <i>s</i>              | <i>m.a.g.l.</i>      | $^{\circ}K$ | <i>m/s</i>            | $^{\circ}$            | $^{\circ}$     |
| 0  | Leg1         | Leg2         | 8/14/2017          | 50                    | 27.56                | 0.6         | 0.3                   | 1.1                   | -0.2           |
| 1  | Leg3         | Leg4         | 8/14/2017          | 77                    | 18.79                | 0.06        | 0.2                   | 1                     | 0.1            |
| 2  | Leg5         | Leg6         | 8/14/2017          | 110                   | 14.67                | 0.1         | 0.6                   | 5.5                   | -3.1           |
| 3  | Leg7         | Leg8         | 8/14/2017          | 0                     | 7.46                 | 0.6         | 0.2                   | 36.2                  | 5.4            |
| 4  | Leg9         | Leg10        | 8/14/2017          | 70                    | 171.62               | 1.3         | 0.0                   | 7                     | -0.6           |
| 5  | Leg1         | Leg2         | 8/15/2017          | 230                   | 18.27                | 0.24        | 1.6                   | 3.8                   | 22.0           |
| 6  | Leg3         | Leg4         | 8/15/2017          | 45                    | 48.99                | 0.6         | 0.6                   | 7.7                   | -5.4           |
| 7  | Leg5         | Leg6         | 8/15/2017          | 85                    | 3.29                 | 0.3         | 0.2                   | 5.5                   | 19.5           |
| 8  | Leg7         | Leg8         | 8/15/2017          | 175                   | 40.4                 | 0.7         | 0.7                   | 0.6                   | 4.8            |
| 9  | Leg9         | Leg10        | 8/15/2017          | 185                   | 9.84                 | 0.2         | 1.0                   | 2.7                   | 3.0            |
| 10 | Leg11        | Leg12        | 8/15/2017          | 145                   | 13.8                 | 0.1         | 0.2                   | 1.8                   | -8.6           |
| 11 | Leg1         | Leg2         | 8/29/2018          | 93                    | 27.3                 | 0.4         | 0.9                   | 0.1                   | 17.6           |
| 12 | Leg3         | Leg4         | 8/29/2018          | 74                    | 2.92                 | 0           | 0.3                   | 1.4                   | 16.1           |
| 13 | Leg6         | Leg7         | 8/29/2018          | 120                   | 8.76                 | 0           | 0.7                   | 2.9                   | -2.4           |
| 14 | Leg1         | Leg2         | 8/1/2019           | 30                    | 12.94                | 0           | 0.5                   | 6.7                   | -2.8           |
| 15 | Leg1         | Leg2         | 8/21/2019          | 60                    | 8.97                 | 0.1         | 0.1                   | 3                     | 2.7            |
| 16 | Leg1         | Leg2         | 9/4/2019           | 150                   | 61.25                | 0.5         | 0.5                   | 14.4                  | 7.6            |
| 17 | Leg3         | Leg4         | 9/4/2019           | 102                   | 18.64                | 0.2         | 0.8                   | 4.5                   | 8.1            |
| 18 | Leg5         | Leg6         | 9/4/2019           | 70                    | 59.68                | 0.4         | 0.7                   | 3                     | 9.9            |
| 19 | Leg7         | Leg8         | 9/4/2019           | 136                   | 120.79               | 0.7         | 0.9                   | 3.7                   | 9.8            |
| 20 | Leg9         | Leg10        | 9/4/2019           | 75                    | 116.71               | 1           | 0.8                   | 1                     | 7.2            |
| 21 | Leg11        | Leg12        | 9/4/2019           | 70                    | 111.05               | 0.7         | 0.6                   | 10.7                  | 6.0            |
| 22 | Leg13        | Leg14        | 9/4/2019           | 85                    | 52.29                | 0.5         | 0.4                   | 5.2                   | 5.2            |
| 23 | Leg15        | Leg16        | 9/4/2019           | 78                    | 122.64               | 0.9         | 0.7                   | 4.4                   | 6.8            |
| 24 | Leg1         | Leg2         | 9/5/2019           | 117                   | 19.62                | 0.1         | 0.3                   | 10.4                  | 17.0           |
| 25 | Leg3         | Leg4         | 9/5/2019           | 102                   | 46.7                 | 0.4         | 0.4                   | 3.2                   | 16.7           |
| 26 | Leg5         | Leg6         | 9/5/2019           | 105                   | 19.36                | 0.1         | 0.7                   | 3.3                   | 20.0           |
| 27 | Leg7         | Leg8         | 9/5/2019           | 68                    | 12.41                | 0.1         | 0.5                   | 0.6                   | 16.4           |
| 28 | Leg9         | Leg10        | 9/5/2019           | 154                   | 75.39                | 0.7         | 0.8                   | 1.1                   | -13.8          |
| 29 | Leg11        | Leg12        | 9/5/2019           | 130                   | 45.45                | 0.4         | 0.1                   | 0.2                   | -11.8          |

|    | <i>leg 1</i> | <i>leg 2</i> | <i>flight_date</i> | $\Delta(\text{time})$ | $\Delta(\text{alt})$ | $\Delta(T)$ | $\Delta(\text{wspd})$ | $\Delta(\text{wdir})$ | $\Delta(\Psi)$ |
|----|--------------|--------------|--------------------|-----------------------|----------------------|-------------|-----------------------|-----------------------|----------------|
|    | -            | -            | <i>m/d/yyyy</i>    | <i>s</i>              | <i>m.a.g.l.</i>      | $^{\circ}K$ | <i>m/s</i>            | $^{\circ}$            | $^{\circ}$     |
| 30 | Leg13        | Leg14        | 9/5/2019           | 105                   | 69.86                | 0.7         | 1.4                   | 1.8                   | -12.1          |
| 31 | Leg15        | Leg16        | 9/5/2019           | 80                    | 96.55                | 0.8         | 1.0                   | 1.4                   | -10.5          |
| 32 | Leg1         | Leg2         | 5/4/2022           | 35                    | 46.8                 | 1           | 0.1                   | 8.8                   | -5.7           |
| 33 | Leg1         | Leg2         | 6/14/2022          | 7                     | 26.56                | 0           | 0.3                   | 6.4                   | -36.9          |
| 34 | Leg1         | Leg2         | 6/15/2022          | 60                    | 1.87                 | 0           | 1.4                   | 14.6                  | 9.3            |
| 35 | Leg3         | Leg4         | 6/15/2022          | 0                     | 1.64                 | 0           | 1.2                   | 38.6                  | 4.9            |
| 36 | Leg5         | Leg6         | 6/15/2022          | 75                    | 17.73                | 0.2         | 0.8                   | 9.8                   | 3.5            |

85

Table S5: General information about the performed pitching maneuvers, including general flight information (date, time height, groundspeed, true airspeed), meteorological conditions (windspeed, wind directions, and wind vector information) and the obtained calibration parameters for  $C_\alpha$ . All wind parameters were calculated after calibration (using average calibration values for 2017/2018 and 2019 - and not with the parameters in the last column). Symbology: *lon* = longitude, *lat* = latitude; *T* = temperature; *M* = median; *wspd* = windspeed; *wdir* = wind direction;  $v_{gs}$  = groundspeed;  $v_{tas}$  = true airspeed;  $\theta$  = Pitch angle;  $C_\alpha$  = calibration value for alpha angle.

95 Table S5 part A

|   | <i>Flight Date</i> | <i>Flight Time</i>  | <i>time</i> | <i>distance</i> | <i>M(lon)</i> | <i>M(lat)</i> | <i>M(height)</i> | <i>M(T)</i>        | <i>M(wspd)</i> | <i>M(wdir)</i> |
|---|--------------------|---------------------|-------------|-----------------|---------------|---------------|------------------|--------------------|----------------|----------------|
|   | -                  | <i>hh:mm:ss</i>     | <i>s</i>    | <i>km</i>       | <i>deg</i>    | <i>deg</i>    | <i>m.a.s.l.</i>  | $^{\circ}\text{K}$ | <i>m/s</i>     | <i>m/s</i>     |
| 1 | 8/9/2017           | 17:08:06 - 17:09:08 | 62          | 1.73            | 12.559        | 52.125        | 2595.3           | 279.4              | 14.39          | 227.5          |
| 2 | 7/18/2018          | 10:40:15 - 10:41:37 | 82          | 2.36            | 12.48         | 52.171        | 2274.4           | 280.4              | 8.8            | 297.1          |
| 3 | 7/18/2018          | 10:43:31 - 10:44:33 | 62          | 2.74            | 12.474        | 52.191        | 2363.8           | 279.8              | 8.66           | 301.3          |
| 4 | 6/7/2018           | 18:24:50 - 18:26:17 | 87          | 2.58            | 12.665        | 52.081        | 650              | 295                | 6.26           | 114.6          |
| 5 | 9/21/2019          | 10:15:16 - 10:17:39 | 143         | 5.56            | 12.24         | 51.948        | 1036             | 286.8              | 0.92           | 308.4          |
| 6 | 9/21/2019          | 10:54:32 - 10:55:40 | 68          | 2.33            | 12.543        | 52.136        | 1034.9           | 287                | 1.49           | 309.3          |
| 7 | 6/14/2022          | 10:01:30 - 10:03:20 | 110         | 3.07            | 13.439        | 53.314        | 2224.4           | 274.4              | 12.24          | 319.2          |

Table S5 part B

|   | <i>Flight Date</i> | <i>M(u)</i> | <i>M(v)</i> | <i>period</i> | <i>M(w)</i> | $\sigma(w)$ | <i>M(g<sub>s</sub>)</i> | <i>min(<math>\theta</math>)</i> | <i>max(<math>\theta</math>)</i> | $C_\alpha$ |
|---|--------------------|-------------|-------------|---------------|-------------|-------------|-------------------------|---------------------------------|---------------------------------|------------|
|   | -                  | <i>m/s</i>  | <i>m/s</i>  | -             | <i>m/s</i>  | <i>m/s</i>  |                         | $^{\circ}$                      | $^{\circ}$                      | -          |
| 1 | 8/9/2017           | 10.51       | 9.7         | 8.9           | 1.15        | 0.25        | 28.3                    | -20.1                           | 8.39                            | 0.090      |
| 2 | 7/18/2018          | 7.93        | -4.1        | 16.4          | 0.02        | 0.24        | 28.2                    | -27.3                           | 17.08                           | 0.105      |
| 3 | 7/18/2018          | 7.37        | -4.5        | 12.4          | 0.38        | 0.17        | 43.5                    | -28                             | 20.3                            | 0.091      |
| 4 | 6/7/2018           | -5.73       | 2.6         | 14.5          | 0.11        | 0.27        | 29.0                    | -21.5                           | 12.83                           | 0.093      |
| 5 | 9/21/2019          | 0.72        | -0.6        | 11.0          | 0.12        | 0.15        | 38.9                    | -28.6                           | 17.18                           | 0.093      |
| 6 | 9/21/2019          | 1.13        | -0.8        | 13.6          | 0.14        | 0.19        | 32.9                    | -30.5                           | 23.57                           | 0.090      |
| 7 | 6/14/2022          | 7.98        | -9.3        | 18.3          | 0.25        | 0.23        | 27.7                    | -20.6                           | 15.55                           | 0.131      |

### **Supplement B: Vertical Flight Profiles**

During several flights, vertical flight profiles were flown to determine the height of the atmospheric boundary layer. Here, we show four vertical profiles flown during two flights over Northeast Germany  
105 (flight dates: 29<sup>th</sup> of August 2018 and 21<sup>st</sup> of August 2019). Abrupt changes in atmospheric chemistry and potential temperature indicate the border of the atmospheric boundary layer.

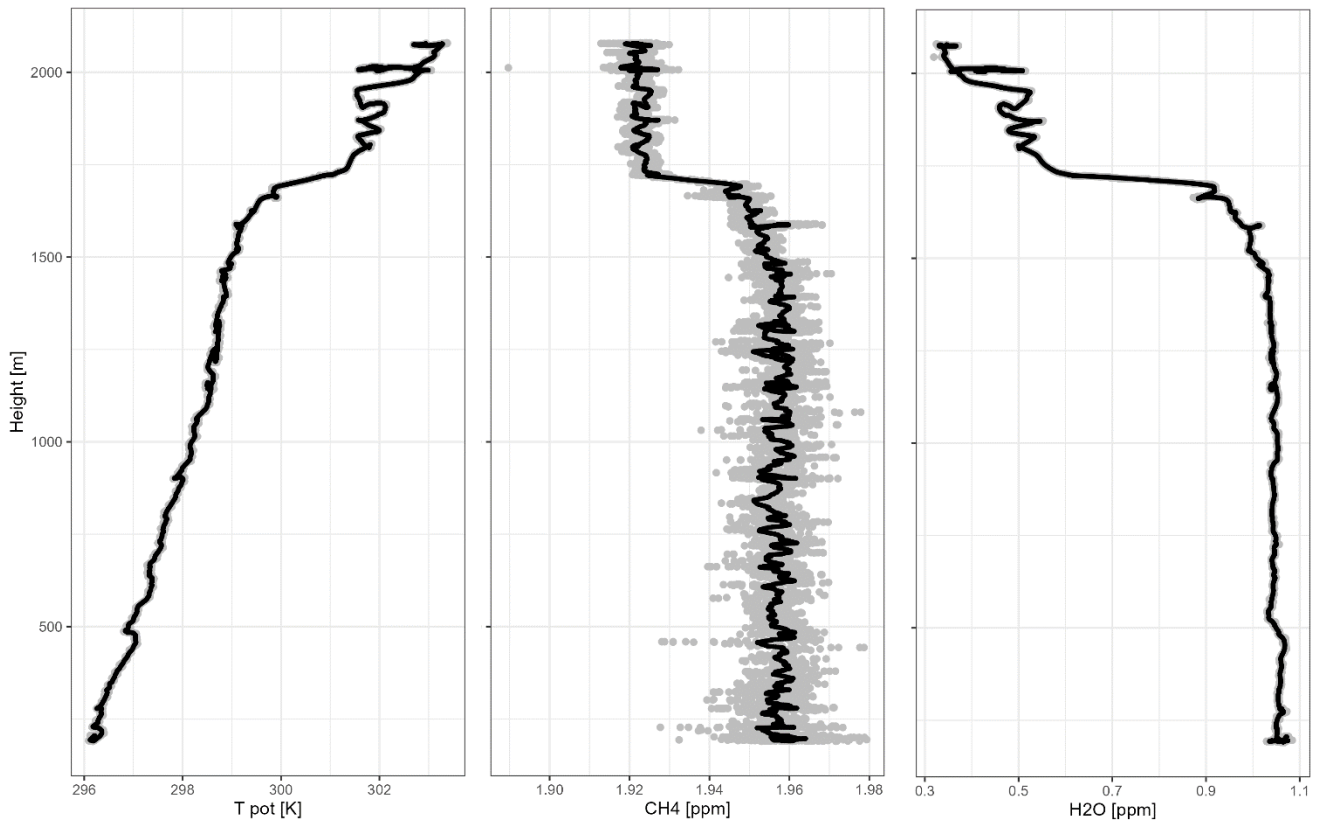

110 **Figure S1:** First vertical flight profile flown on the 29<sup>th</sup> of August 2018, close to Demmin, Germany  
 (Mecklenburg-Vorpommern). This profile was flown to determine the height of the atmospheric boundary  
 layer, which is defined by abrupt changes in CH<sub>4</sub>, H<sub>2</sub>O and potential Temperature. Grey dots indicate  
 measured variability in concentrations/ temperature at a specific height whereas black lines indicate  
 height averaged concentrations/ temperature. The y-axis represents the measurement height (altitude)  
 115 above ground level.

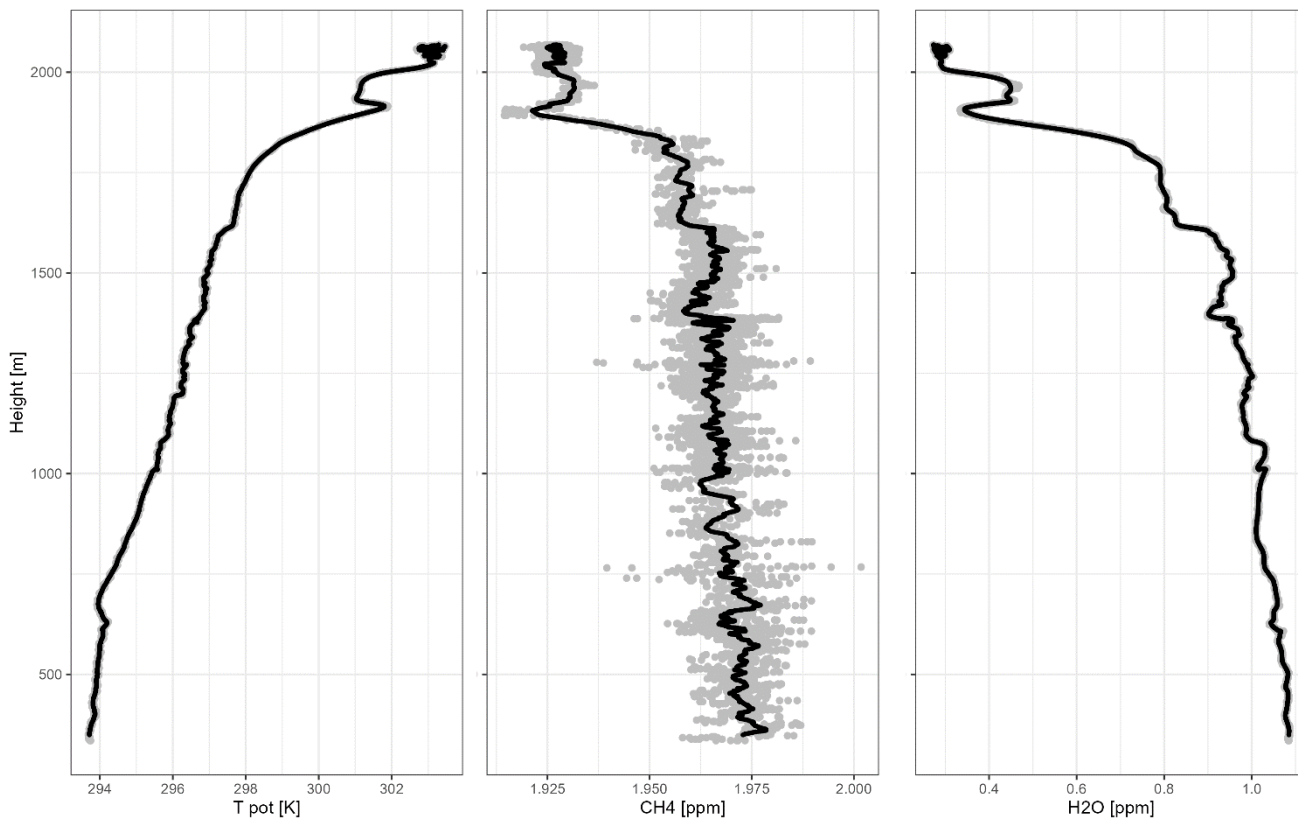

**Figure S2:** Second vertical flight profile flown on the 29<sup>th</sup> of August 2018, close to Demmin, Germany.

120 This profile was flown to determine the height of the atmospheric boundary layer, which is defined by abrupt changes in CH<sub>4</sub>, H<sub>2</sub>O and potential Temperature. Grey dots indicate measured variability in concentrations/ temperature at a specific height whereas black lines indicate height averaged concentrations/ temperature. The y-axis represents the measurement height (altitude) above ground level.

125

130

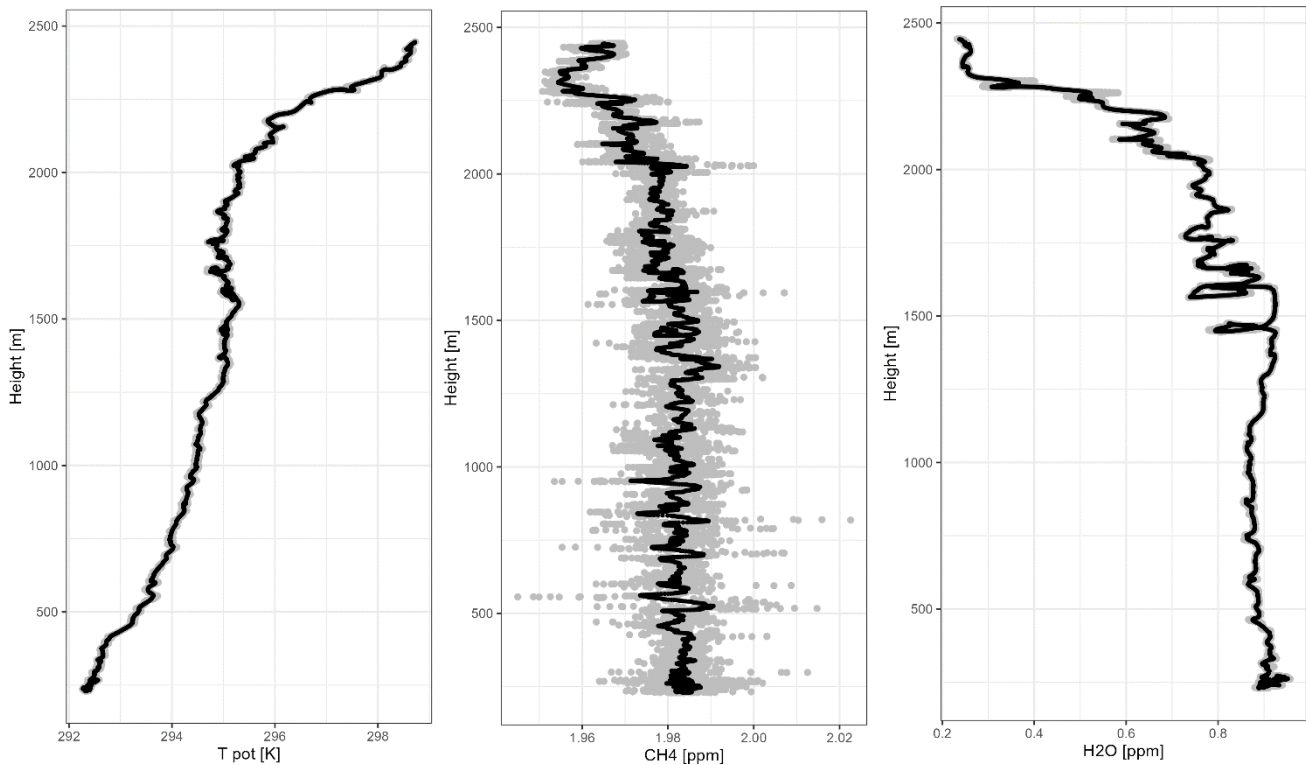

135 **Figure S3:** First vertical flight profile flown on the 21<sup>st</sup> of August 2019, close to the Müritz national park in Germany. This profile was flown to determine the height of the atmospheric boundary layer, which is defined by abrupt changes in CH<sub>4</sub>, H<sub>2</sub>O and potential Temperature. Grey dots indicate measured variability in concentrations/ temperature at a specific height whereas black lines indicate height averaged concentrations/ temperature. The y-axis represents the measurement height (altitude) above ground level.

140



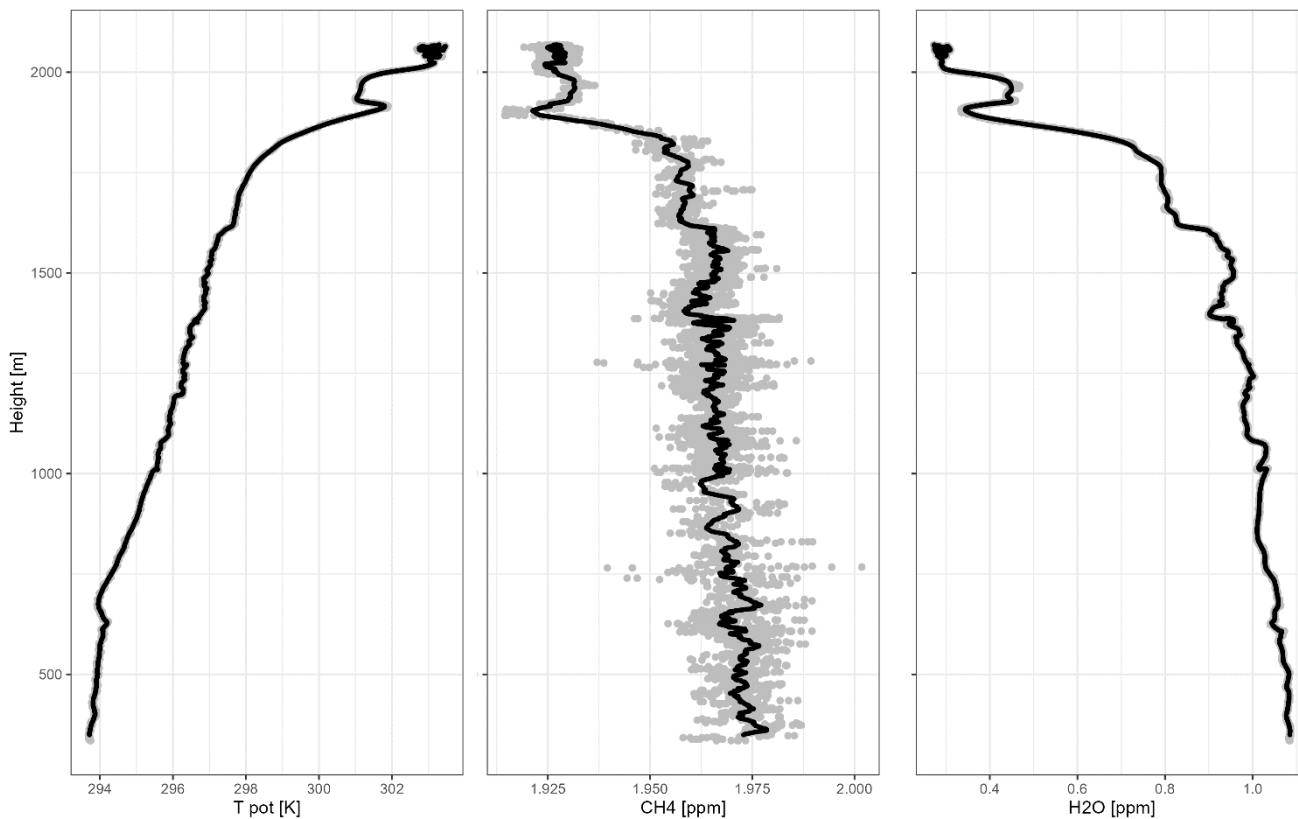

**Figure S4:** Second vertical flight profile flown on the 21<sup>st</sup> of August 2019, close to the Müritz national park in Germany. This profile was flown to determine the height of the atmospheric boundary layer, which is defined by abrupt changes in CH<sub>4</sub>, H<sub>2</sub>O and potential Temperature. Grey dots indicate measured variability in concentrations/ temperature at a specific height whereas black lines indicate height averaged concentrations/ temperature. The y-axis represents the measurement height (altitude) above ground level.
